# Supplementary material for: Systematic identification of factors mediating accelerated mRNA degradation in response to changes in environmental nitrogen
Source: PLoS Genet. 2018 May 21;14(5):e1007406. doi: 10.1371/journal.pgen.1007406 (PMC5983874; doi:10.1371/journal.pgen.1007406)
Supplement: S8 Table — (CSV) [file pgen.1007406.s010.csv]

#
# Supplementary Table
#
# Table of BFF FACS-run gates and events observed in each gate.
# Note that there are some gaps between gates	this is because they
# were drawn with a GUI by the sorting technician.
#
# Key:
# Biological replicate	gate ID	lower bound of APC.A signal for that gate	upper bound of APC.A signal for that gate	events observed going into that gate during FACS run used for sequencing	the mean APC.A signal of events in that bin observed using 10000 events per sample in a flow cytometry run used to determine the gate boundaries
A	p2	1	1766	1093173	1254.1515447040179
A	p3	1772	3789	1028599	2614.2619460770743
A	p4	3841	8396	918549	5840.142678298818
A	p5	8494	101200	734058	17283.378684082032
A	p6	1	1239	1340056	1009.0217679764379
A	p7	1239	1530	1011347	1377.6774331445317
A	p8	1530	2171	959941	1788.1308860809547
A	p9	2175	101200	729971	4917.282174136837
B	p2	1	1766	1002007	1280.621478124504
B	p3	1772	3789	1028599	2626.350001647707
B	p4	3841	8396	1063116	5786.014676260398
B	p5	8494	101200	1006965	18278.249528566892
B	p6	1	1239	1296444	1031.0195644016526
B	p7	1239	1530	1091615	1380.9460182427194
B	p8	1530	2171	1168612	1781.4198831865865
B	p9	2175	101200	1027629	4893.981869202136
C	p2	1	1766	468578	1284.1460081178352
C	p3	1772	3789	407245	2601.0192127606847
C	p4	3841	8396	426347	5825.249374296912
C	p5	8494	101200	476639	19125.30267429498
C	p6	1	1239	548282	1028.5563136088776
C	p7	1239	1530	421597	1379.2423637084823
C	p8	1530	2171	410400	1782.032957868332
C	p9	2175	101200	358944	4941.720043716004
